# Supplementary material
Source: PubMed Central journal article supplement (PMC3786400)
Supplement: NIHMS499826-supplement-ESI.pdf [file NIHMS499826-supplement-ESI.pdf]

# Microfluidic heart on a chip for higher throughput pharmacological studies

Ashutosh Agarwal,<sup>a</sup> Josue Adrian Goss,<sup>a</sup> Alexander Cho,<sup>a</sup> Megan Laura McCain<sup>a</sup> and Kevin Kit Parker<sup>\*a</sup>

Received (in XXX, XXX) Xth XXXXXXXXXX 20XX, Accepted Xth XXXXXXXXXX 20XX

5 DOI: 10.1039/b000000x

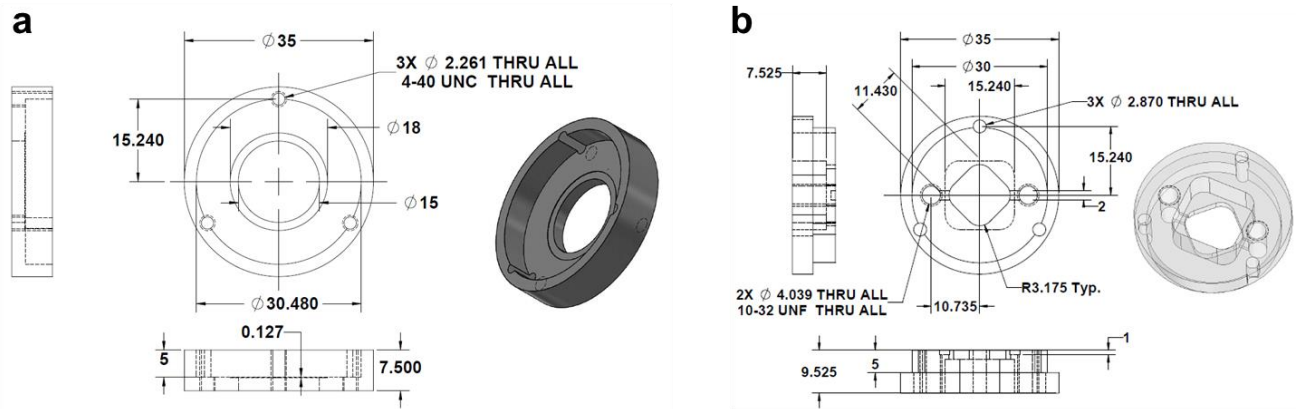

**Supplementary Figure 1:** Engineering drawing for the (a) aluminum base and the (b) polycarbonate top piece of the fluidic microdevice showing the top view, side sections and an isometric rendering along with various dimensions. All dimensions are in mm.
